# Supplementary material for: An efficient Nb-modified BiVO4 film for photo-induced bacterial inactivation and photocatalytic removal of organic pollutants
Source: Royal Society of Chemistry journal article supplement (doi:10.1039/c8nj01069b), 2018-01-01
Supplement: c8nj01069b1.pdf [file c8nj01069b1.pdf]

## Efficient Nb-modified BiVO<sub>4</sub> film for photo-induced bacterial inactivation and photocatalytic removal of organic pollutant

Received 00th March 2018,  
Accepted 00th March 2018

DOI: 10.1039/x0xx00000x

[www.rsc.org/](http://www.rsc.org/)

Olivier Monfort,<sup>\*ab</sup> Ewa Dworniczek,<sup>c</sup> Leonid Satrapinsky,<sup>d</sup> Alicja Seniuk,<sup>c</sup> Daniela Nyblova<sup>a</sup> and Gustav Plesch<sup>a</sup>

<sup>a</sup>Comenius University in Bratislava, Faculty of Natural Sciences, Department of Inorganic Chemistry, 842 15 Bratislava, Slovakia.

<sup>b</sup>Univ Rennes, Ecole Nationale Supérieure de Chimie de Rennes, CNRS, ISCR (Institut des Sciences Chimiques de Rennes) – UMR 6226, F-35000 Rennes, France.

<sup>c</sup>Wroclaw Medical University, Department of Microbiology, 50368 Wroclaw, Poland.

<sup>d</sup>Comenius University in Bratislava, Faculty of Mathematics Physics and Informatics, Department of Experimental Physics, 842 48 Bratislava, Slovakia.

\* Correspondence: [olivier.monfort@ensc-rennes.fr](mailto:olivier.monfort@ensc-rennes.fr)

### Electronic Supplementary Information

The XRD shows that the photocatalysts are composed of monoclinic scheelite BiVO<sub>4</sub> and/or TiO<sub>2</sub> anatase. The artefact present on certain XRD patterns is from the sample holder.

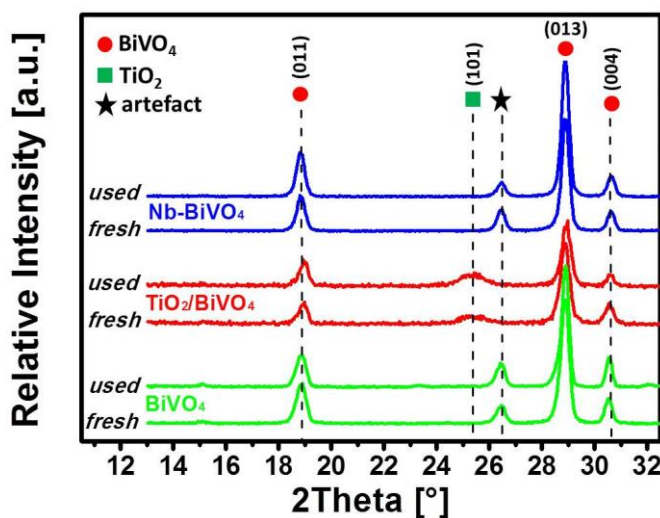

Figure S1. XRD of freshly prepared and used photocatalysts.
